# Supplementary material
Source: PubMed Central journal article supplement (PMC33145)
Supplement: pnas_98_9_4955__1.pdf [file pnas_98_9_4955__1.pdf]

**Table 5.** Detailed descriptions of the designs: Dihedrals and lengths

| Site | Residue           | $\chi_1$ | $\chi_2$ | $\kappa$ | N–Zn bond length |
|------|-------------------|----------|----------|----------|------------------|
| A1   | H63 <sub>II</sub> | 47.3     | –84.1    | –178.1   | 2.883            |
|      | H66 <sub>II</sub> | –66.8    | –94.3    | 172.2    | 2.155            |
|      | H340 <sub>I</sub> | –58.6    | –135.7   | –34.8    | 2.671            |
| A2   | H63 <sub>II</sub> | 51.4     | –87.3    | –179.2   | 2.030            |
|      | H66 <sub>II</sub> | –58.9    | –97.5    | 166.5    | 2.373            |
|      | H155 <sub>I</sub> | –60.6    | 85.7     | 174.5    | 2.508            |
| B1   | H42 <sub>II</sub> | –172.2   | –98.7    | 160.1    | 2.392            |
|      | H44 <sub>II</sub> | 65.5     | –93.2    | 168.1    | 2.272            |
|      | H341 <sub>I</sub> | –61.3    | 94.3     | –167.7   | 2.776            |
| B2   | H48 <sub>II</sub> | –61.9    | –70.2    | –153.8   | 2.003            |
|      | H69 <sub>II</sub> | 167.5    | –106.1   | –12.6    | 2.234            |
|      | H338 <sub>I</sub> | –75.1    | –77.9    | –163.9   | 2.223            |

All sites are designed to coordinate Zn through the histidine N<sub>ε</sub>, except for A1: H340<sub>I</sub> and B1: H69<sub>II</sub>, which coordinate through N<sub>δ</sub>.  $\chi$  angles reported in degrees. N–Zn bond length reported in Å.  $\chi_1$  defined as dihedral of N–C<sub>α</sub>–C<sub>β</sub>–C<sub>γ</sub>.  $\chi_2$  defined as dihedral of C<sub>α</sub>–C<sub>β</sub>–C<sub>γ</sub>–C<sub>δ</sub>.  $\kappa$  defined as dihedral of C<sub>γ</sub>–C<sub>δ</sub>–N<sub>ε</sub>–Zn (C<sub>β</sub>–C<sub>γ</sub>–N<sub>δ</sub>–Zn for A1: H340<sub>I</sub> and B1: H69<sub>II</sub>). All dihedrals are within 30° of the observed rotamers for histidine [Lovell, S.C., Word, M. J., Richardson, J. S. & Richardson, D. C. (2000) *Proteins* **40**, 389–408]. Subscripts I and II refer to the domain in which the residue is located (see Fig. 1).
