# Supplementary material
Source: PubMed Central journal article supplement (PMC33145)
Supplement: pnas_98_9_4955__2.pdf [file pnas_98_9_4955__2.pdf]

**Table 6.** Detailed descriptions of the designs: Angles

| Site | Angle definition                                                      | Angle |
|------|-----------------------------------------------------------------------|-------|
| A1   | H63 <sub>II</sub> N <sub>ε</sub> -Zn-H66 <sub>II</sub> N <sub>ε</sub> | 83.3  |
|      | H63 <sub>II</sub> N <sub>ε</sub> -Zn-H340 <sub>I</sub> N <sub>δ</sub> | 132.1 |
|      | H66 <sub>II</sub> N <sub>ε</sub> -Zn-H340 <sub>I</sub> N <sub>δ</sub> | 99.5  |
| A2   | H63 <sub>II</sub> N <sub>ε</sub> -Zn-H66 <sub>II</sub> N <sub>ε</sub> | 91.7  |
|      | H63 <sub>II</sub> N <sub>ε</sub> -Zn-H155 <sub>I</sub> N <sub>ε</sub> | 106.2 |
|      | H66 <sub>II</sub> N <sub>ε</sub> -Zn-H155 <sub>I</sub> N <sub>ε</sub> | 136.2 |
| B1   | H42 <sub>II</sub> N <sub>ε</sub> -Zn-H44 <sub>II</sub> N <sub>ε</sub> | 81.4  |
|      | H42 <sub>II</sub> N <sub>ε</sub> -Zn-H341 <sub>I</sub> N <sub>ε</sub> | 124.3 |
|      | H44 <sub>II</sub> N <sub>ε</sub> -Zn-H341 <sub>I</sub> N <sub>ε</sub> | 143.2 |
| B2   | H48 <sub>II</sub> N <sub>ε</sub> -Zn-H69 <sub>II</sub> N <sub>δ</sub> | 82.1  |
|      | H48 <sub>II</sub> N <sub>ε</sub> -Zn-H338 <sub>I</sub> N <sub>ε</sub> | 136.8 |
|      | H69 <sub>II</sub> N <sub>ε</sub> -Zn-H338 <sub>I</sub> N <sub>ε</sub> | 88.3  |

Angles reported in degrees. Subscripts I and II refer to the domain in which the residue is located (see Fig. 1).
